# Supplementary material
Source: PubMed Central journal article supplement (PMC7501173)

**A**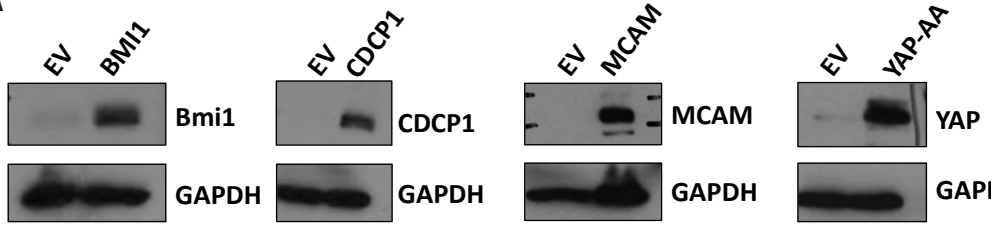**B**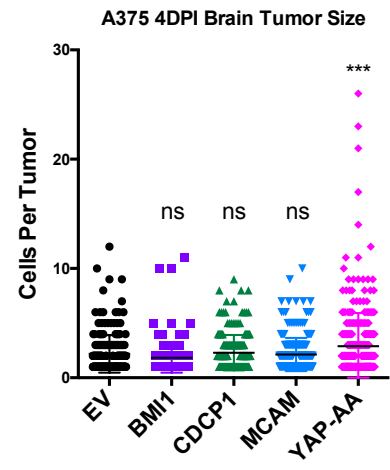**C**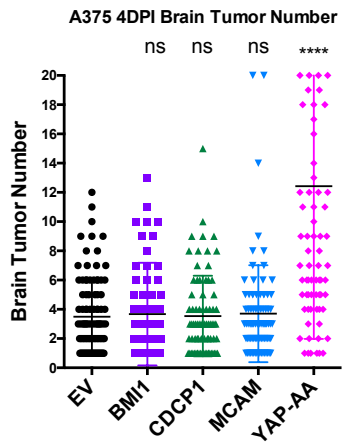**D**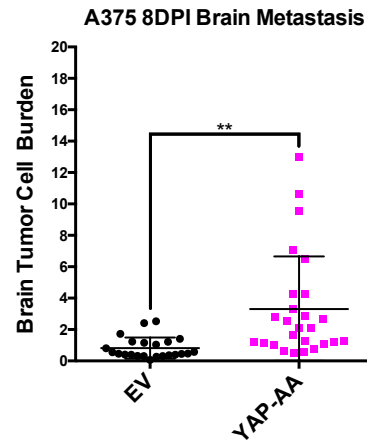**E**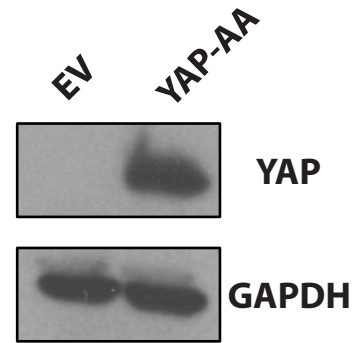

Supplement: NIHMS1608504-supplement-1.pdf [file NIHMS1608504-supplement-1.pdf]

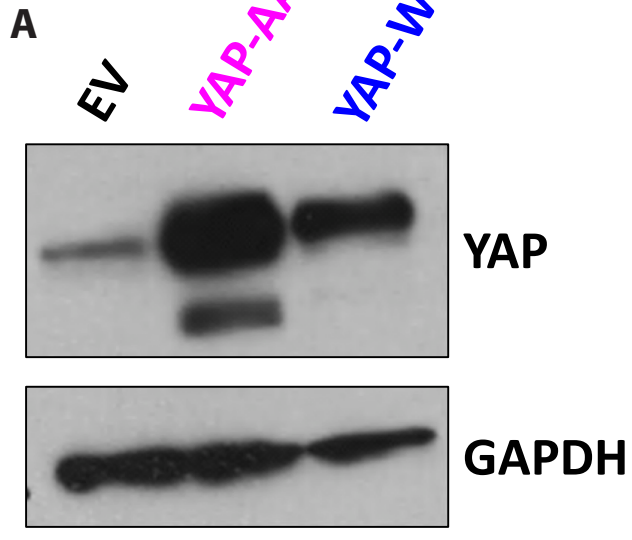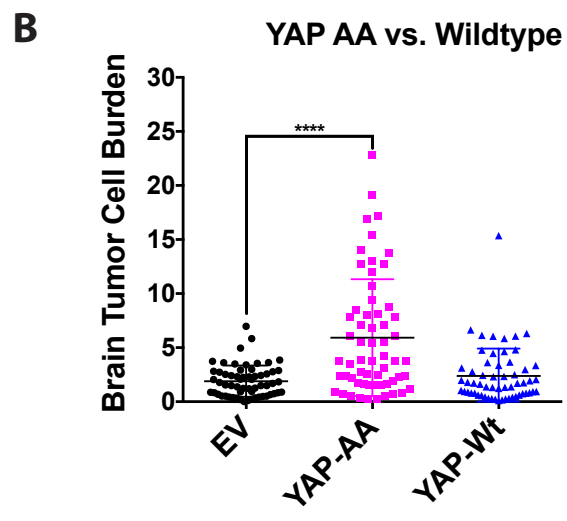

Supplement: NIHMS1608504-supplement-2.pdf [file NIHMS1608504-supplement-2.pdf]

**A****EV**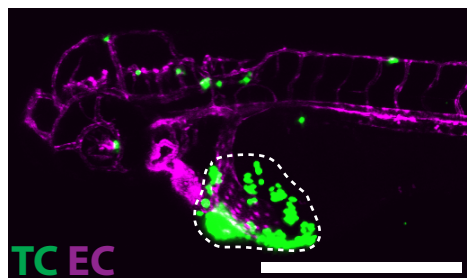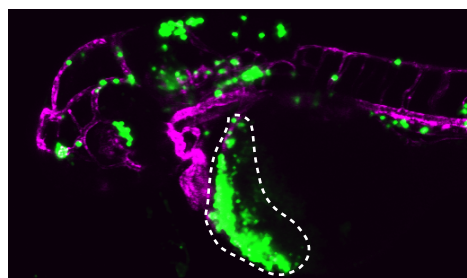**YAP-AA****B**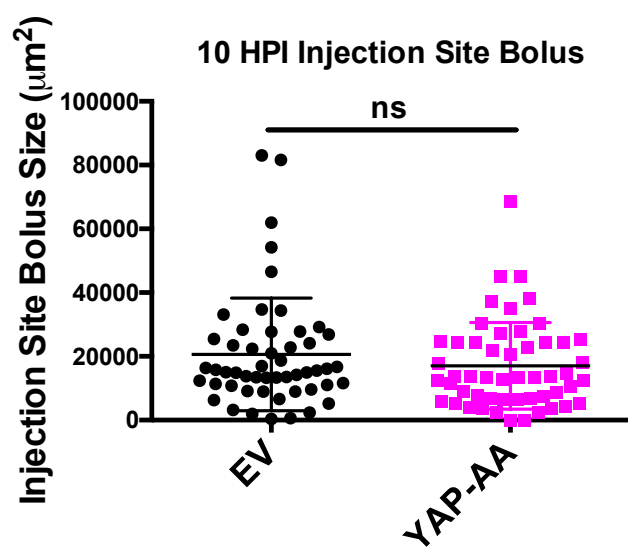

Supplement: NIHMS1608504-supplement-3.pdf [file NIHMS1608504-supplement-3.pdf]

**A**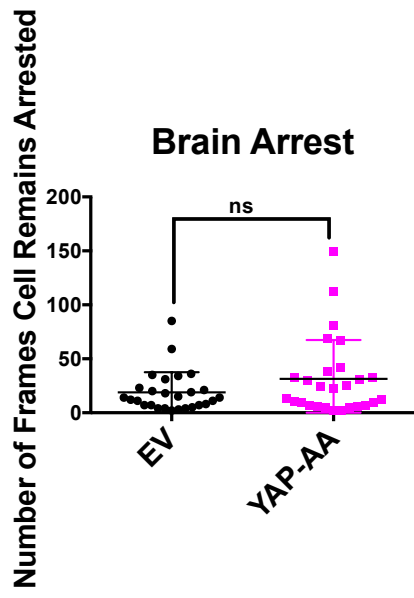**B**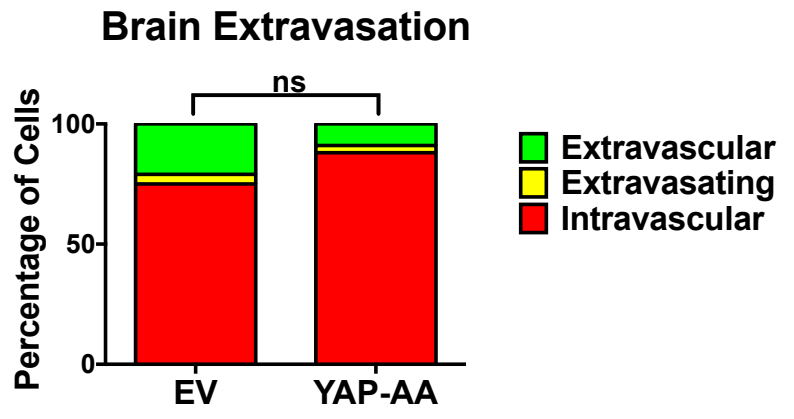**C**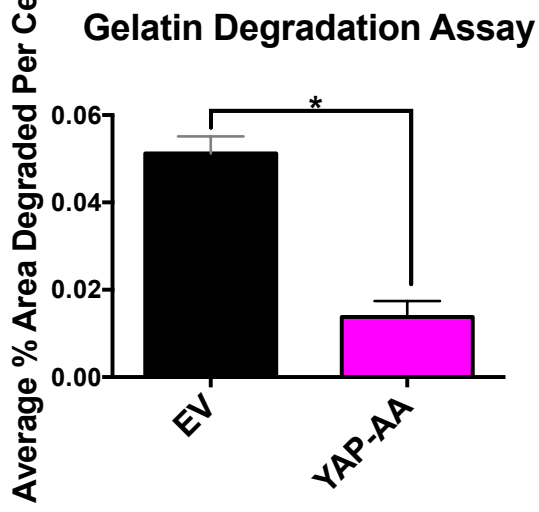**D**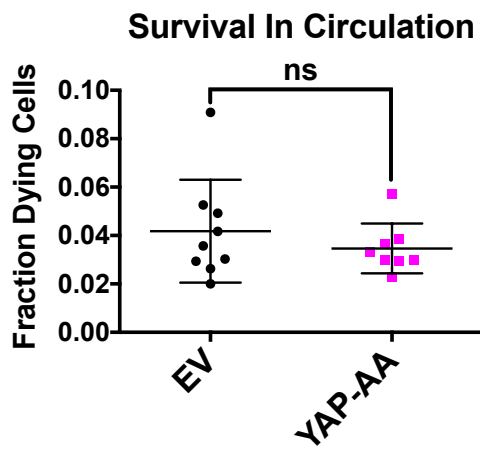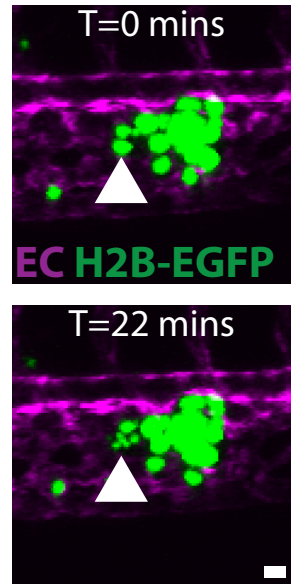

Supplement: NIHMS1608504-supplement-4.pdf [file NIHMS1608504-supplement-4.pdf]

A

### Transit Times

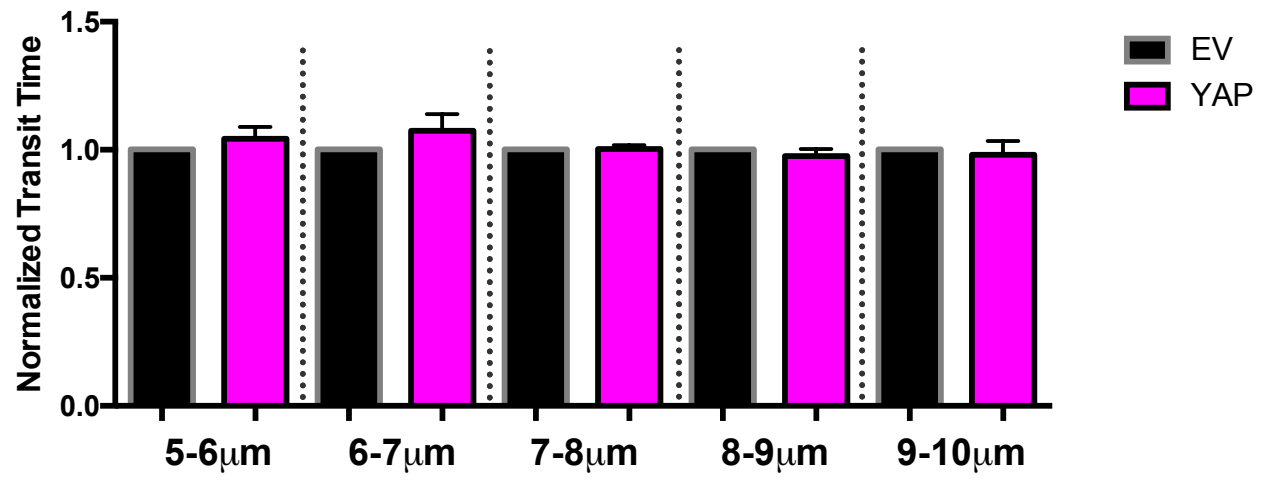

Transit Time vs. Cell Radius

Supplement: NIHMS1608504-supplement-5.pdf [file NIHMS1608504-supplement-5.pdf]

**A**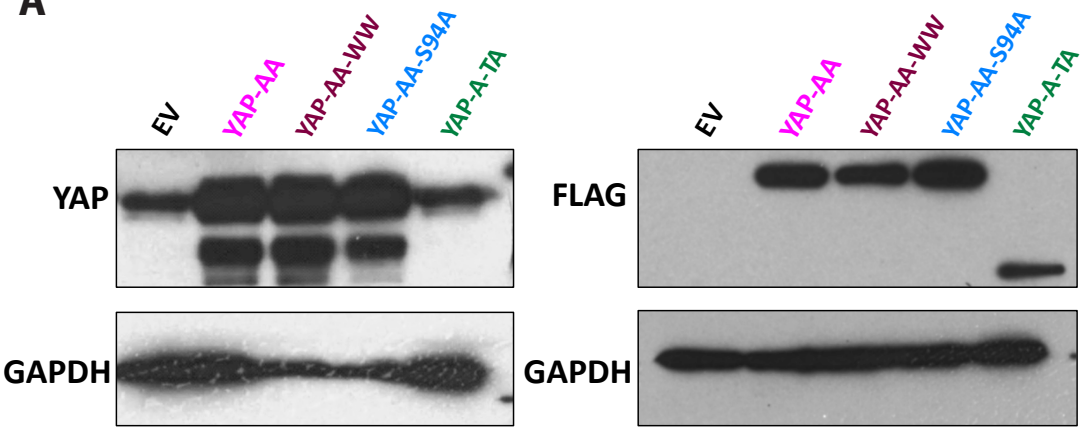

Supplement: NIHMS1608504-supplement-6.pdf [file NIHMS1608504-supplement-6.pdf]
